# Supplementary material for: Thermodynamic Parameters of Crosslinked Elastomers (BR, SBR and NBR) and Their Blends
Source: MDPI journal article supplement (doi:10.3390/polym16030351), 2024-01-28
Supplement: s1 [file s1]

# Thermodynamic Parameters of Crosslinked Elastomers (BR, SBR and NBR) and Their Blends

César Leyva-Porras \*, Iván A. Estrada-Moreno \*, Claudia I. Piñón-Balderrama, Sergio G. Flores-Gallardo and Alfredo Márquez-Lucero

Advanced Materials Research Center (CIMAV), Complejo Industrial Chihuahua, Miguel de Cervantes No. 120, Chihuahua 31136, Mexico; claudia.pinon@cimav.edu.mx (C.I.P.-B.); sergio.flores@cimav.edu.mx (S.G.F.-G.); alfredo.marquez@cimav.edu.mx (A.M.-L.)

\* Correspondence: cesar.leyva@cimav.edu.mx (C.L.-P.); ivan.estrada@cimav.edu.mx (I.A.E.-M.); Tel.: +52-61-4439-1100 (ext. 2011) (C.L.-P.); +52-61-4439-1100 (ext. 2404) (I.A.E.-M.)

**Table S1.** Sample identification and crosslinking time ( $\tau$ ). Values determined experimentally: Weights from the Soxhlet extraction process, crosslinking density ( $\Theta$ ), swelling ratio ( $\Phi_{sw}$ ), density ( $\rho$ ) and Young's modulus (YM). Calculated values for parameters  $M_c$  and  $\chi_{12}^*$ .

| Sample  | $\tau$<br>(min) | $W_1$<br>(g) | $W_2$<br>(g) | $W_3$<br>(g) | $W_4$<br>(g) | $\Theta$<br>(%) | $1/\Phi_{sw}$ | $\rho$<br>(kg/m <sup>3</sup> ) | YM<br>(Pa) | $M_c$<br>(Kg/Kmol) | $\chi_{12}^*$ |
|---------|-----------------|--------------|--------------|--------------|--------------|-----------------|---------------|--------------------------------|------------|--------------------|---------------|
| BR      | 2               | 1.7305       | 1.1403       | 4.71         | 1.7489       | 1.61            | 165.5         | 900                            | 931950     | 7181.7             | 0.419         |
| BR      | 4               | 1.9872       | 1.1046       | 10           | 2.9247       | 84.87           | 10.4          | 900                            | 1030050    | 6497.7             | 0.526         |
| BR      | 6               | 1.8738       | 1.1367       | 12.13        | 2.8709       | 87.72           | 8.6           | 890                            | 1491120    | 4438.7             | 0.541         |
| BR      | 10              | 1.9529       | 1.0811       | 8.22         | 2.9967       | 96.55           | 5.5           | 900                            | 1716750    | 3898.6             | 0.539         |
| BR      | 20              | 1.8247       | 1.1774       | 8.11         | 2.9786       | 98.00           | 6.1           | 910                            | 2815470    | 2403.6             | 0.544         |
| SBR     | 2               | 2.0266       | 1.1198       | 12.26        | 2.367        | 30.40           | 32            | 940                            | 98100      | 71259.1            | 0.508         |
| SBR     | 4               | 1.8264       | 1.1519       | 14.16        | 2.4001       | 49.80           | 18.3          | 930                            | 127530     | 54231.5            | 0.516         |
| SBR     | 6               | 2.0193       | 1.1282       | 13.05        | 2.6543       | 56.28           | 22.6          | 930                            | 176580     | 39167.2            | 0.511         |
| SBR     | 10              | 1.9437       | 1.1135       | 9.67         | 2.6544       | 63.83           | 11.4          | 930                            | 264870     | 26111.5            | 0.522         |
| SBR     | 20              | 1.9145       | 1.1451       | 9.2          | 2.6762       | 66.52           | 10.1          | 940                            | 323730     | 21593.6            | 0.528         |
| NBR     | 2               | 1.8842       | 1.107        | 9.87         | 2.6428       | 68.53           | 11.6          | 980                            | 294300     | 24763.8            | 0.528         |
| NBR     | 4               | 1.7058       | 1.1414       | 12.86        | 2.5432       | 73.37           | 12            | 970                            | 333540     | 21627.4            | 0.526         |
| NBR     | 6               | 1.7403       | 1.0816       | 10.69        | 2.5554       | 75.36           | 14.7          | 980                            | 343350     | 21226.1            | 0.522         |
| NBR     | 10              | 2.042        | 1.095        | 9.44         | 3.0553       | 92.54           | 7.9           | 970                            | 461070     | 15645.3            | 0.544         |
| NBR     | 20              | 1.979        | 1.1274       | 8.53         | 3.0473       | 94.76           | 6.5           | 960                            | 559170     | 12767.5            | 0.550         |
| BR-SBR  | 2               | 2.2939       | 1.136        | 4.98         | 2.3007       | 0.60            | 412.9         | 920                            | 245250     | 27897.1            | 0.421         |
| BR-SBR  | 4               | 1.5169       | 1.1572       | 12.99        | 1.9374       | 36.34           | 28.1          | 910                            | 264870     | 25549.9            | 0.510         |
| BR-SBR  | 6               | 1.83         | 1.0899       | 13.52        | 2.2806       | 41.34           | 26.7          | 910                            | 372780     | 18153.9            | 0.510         |
| BR-SBR  | 10              | 1.7616       | 1.1397       | 9.08         | 2.6654       | 79.30           | 8.3           | 910                            | 431640     | 15678.3            | 0.538         |
| BR-SBR  | 20              | 1.8749       | 1.0335       | 7.9          | 2.7609       | 85.73           | 7             | 920                            | 490500     | 13948.5            | 0.546         |
| BR-NBR  | 2               | 1.79         | 1.1579       | 11.79        | 2.3043       | 44.42           | 20.7          | 940                            | 353160     | 19794.2            | 0.515         |
| BR-NBR  | 4               | 1.9493       | 1.1241       | 11.49        | 2.4644       | 45.82           | 19.7          | 940                            | 539550     | 12956.2            | 0.515         |
| BR-NBR  | 6               | 1.9988       | 1.032        | 11.89        | 2.8294       | 80.48           | 12.6          | 940                            | 559170     | 12501.6            | 0.525         |
| BR-NBR  | 10              | 2.134        | 1.1225       | 8.86         | 3.1758       | 92.81           | 6.8           | 940                            | 696510     | 10036.4            | 0.550         |
| BR-NBR  | 20              | 2.2045       | 1.0866       | 8.39         | 3.2647       | 97.57           | 6.1           | 940                            | 765180     | 9135.7             | 0.556         |
| SBR-NBR | 2               | 1.7688       | 1.1227       | 11.36        | 2.2772       | 45.28           | 20.2          | 950                            | 166770     | 42363              | 0.516         |
| SBR-NBR | 4               | 1.7356       | 1.1467       | 13.7         | 2.316        | 50.61           | 22.1          | 950                            | 166770     | 42363              | 0.514         |

|         |    |        |        |       |        |       |      |     |        |         |       |
|---------|----|--------|--------|-------|--------|-------|------|-----|--------|---------|-------|
| SBR-NBR | 6  | 1.6807 | 1.145  | 14.36 | 2.2971 | 53.83 | 22.1 | 950 | 235440 | 30007.1 | 0.514 |
| SBR-NBR | 10 | 2.0103 | 1.082  | 9.08  | 2.8902 | 81.32 | 8.5  | 950 | 274680 | 25720.4 | 0.539 |
| SBR-NBR | 20 | 1.8111 | 1.0842 | 8.14  | 2.7243 | 84.23 | 7.4  | 950 | 284490 | 24833.5 | 0.546 |

$W_1$  is the initial weight of the extraction capsule,  $W_2$  is the weight of the elastomer sample,  $W_3$  is the weight of the swollen elastomer in the extraction capsule, and  $W_4$  is the dried weight of the remaining elastomer in the capsule after the extraction process.

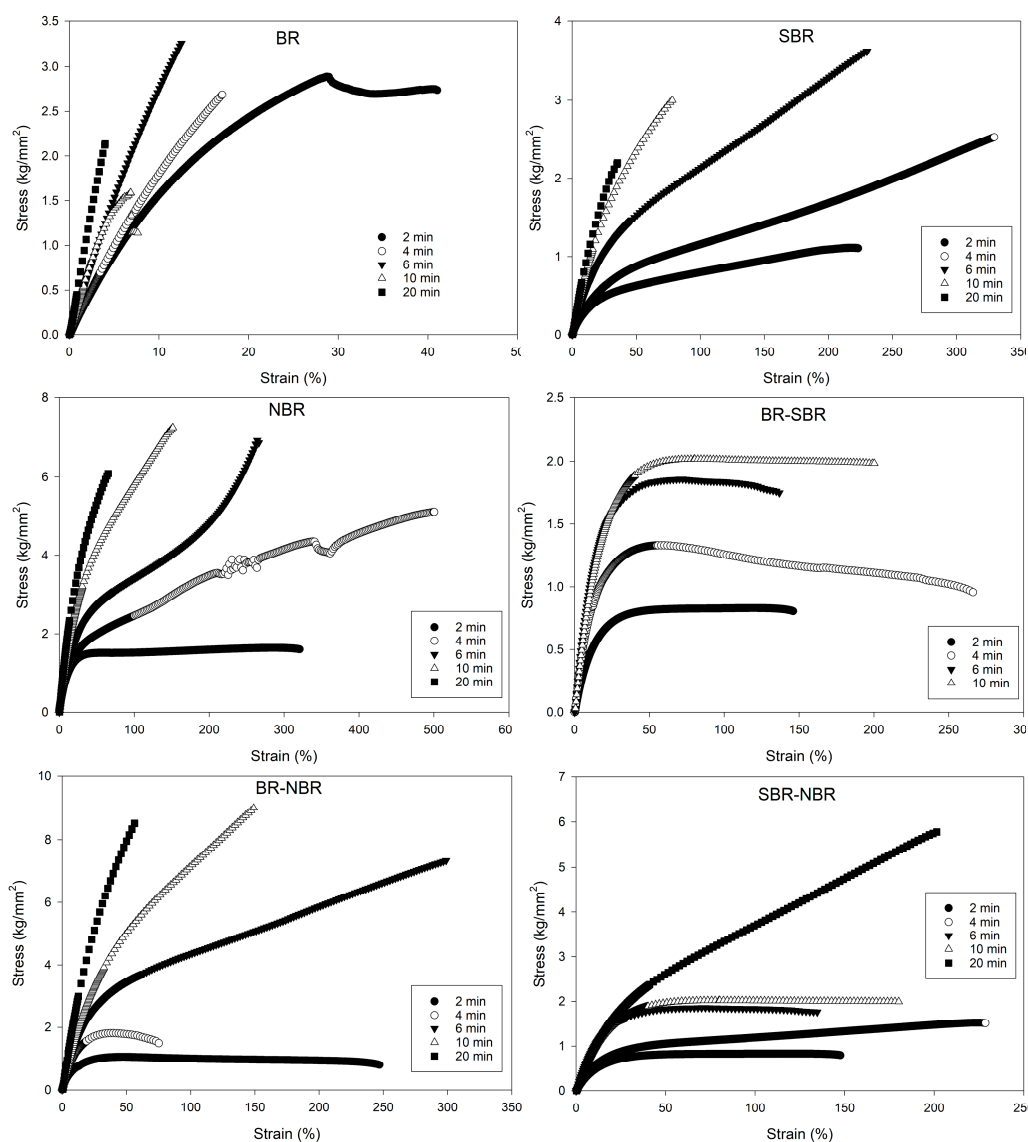

**Figure S1.** Stress-strain curves for the elastomers (BR, SBR, and NBR) and their blends (BR-SBR, BR-NBR, and SBR-NBR).

**Tables S2.** Calculated values of the thermodynamic parameters.

| Sample | $\tau$<br>(min) | $\Delta G_{\text{mix}}$<br>(J/Kmol) | $\Delta S_{\text{mix}}$<br>(J/Kmol) | $\Delta H_{\text{mix}}$<br>(J/Kmol) |
|--------|-----------------|-------------------------------------|-------------------------------------|-------------------------------------|
| BR     | 2               | 6645.12                             | 0.15                                | 6690.53                             |
| BR     | 4               | 114005.23                           | 40.31                               | 126023.85                           |
| BR     | 6               | 137521.82                           | 60.51                               | 155561.63                           |
| BR     | 10              | 208487.03                           | 153.86                              | 254358.95                           |
| BR     | 20              | 188680.70                           | 122.46                              | 225191.52                           |

---

|         |    |           |        |           |
|---------|----|-----------|--------|-----------|
| SBR     | 2  | 38242.43  | 4.13   | 39475.21  |
| SBR     | 4  | 66431.83  | 12.88  | 70272.97  |
| SBR     | 6  | 53828.41  | 8.34   | 56315.08  |
| SBR     | 10 | 105073.92 | 33.79  | 115149.51 |
| SBR     | 20 | 117866.88 | 43.23  | 130754.84 |
| NBR     | 2  | 103515.62 | 32.74  | 113276.33 |
| NBR     | 4  | 100241.25 | 30.58  | 109358.06 |
| NBR     | 6  | 82171.15  | 20.10  | 88164.51  |
| NBR     | 10 | 148959.89 | 71.96  | 170414.63 |
| NBR     | 20 | 177501.79 | 106.37 | 209215.11 |
| BR-SBR  | 2  | 2596.80   | 0.02   | 2604.08   |
| BR-SBR  | 4  | 43383.81  | 5.36   | 44982.54  |
| BR-SBR  | 6  | 45578.96  | 5.94   | 47349.74  |
| BR-SBR  | 10 | 142256.29 | 65.03  | 161645.64 |
| BR-SBR  | 20 | 166493.74 | 92.12  | 193957.90 |
| BR-NBR  | 2  | 58810.63  | 10.02  | 61799.57  |
| BR-NBR  | 4  | 61663.11  | 11.07  | 64963.64  |
| BR-NBR  | 6  | 95192.83  | 27.42  | 103369.58 |
| BR-NBR  | 10 | 171883.50 | 98.96  | 201387.03 |
| BR-NBR  | 20 | 189165.21 | 122.91 | 225810.80 |
| SBR-NBR | 2  | 60033.34  | 10.45  | 63147.87  |
| SBR-NBR | 4  | 54999.55  | 8.72   | 57598.80  |
| SBR-NBR | 6  | 55101.10  | 8.76   | 57711.75  |
| SBR-NBR | 10 | 138245.22 | 61.07  | 156453.33 |
| SBR-NBR | 20 | 159320.93 | 83.48  | 184210.81 |

---
